# Supplementary material for: Efficient Hydrogen-Dependent Carbon Dioxide Reduction by Escherichia coli
Source: PubMed Central journal article supplement (PMC5772173; doi:10.1016/j.cub.2017.11.050), 2018-01-08
Supplement: mmc1.pdf [file mmc1.pdf]

**Current Biology, Volume 28**

**Supplemental Information**

**Efficient Hydrogen-Dependent Carbon Dioxide  
Reduction by *Escherichia coli***

**Magali Roger, Fraser Brown, William Gabrielli, and Frank Sargent**

FIGURE S1

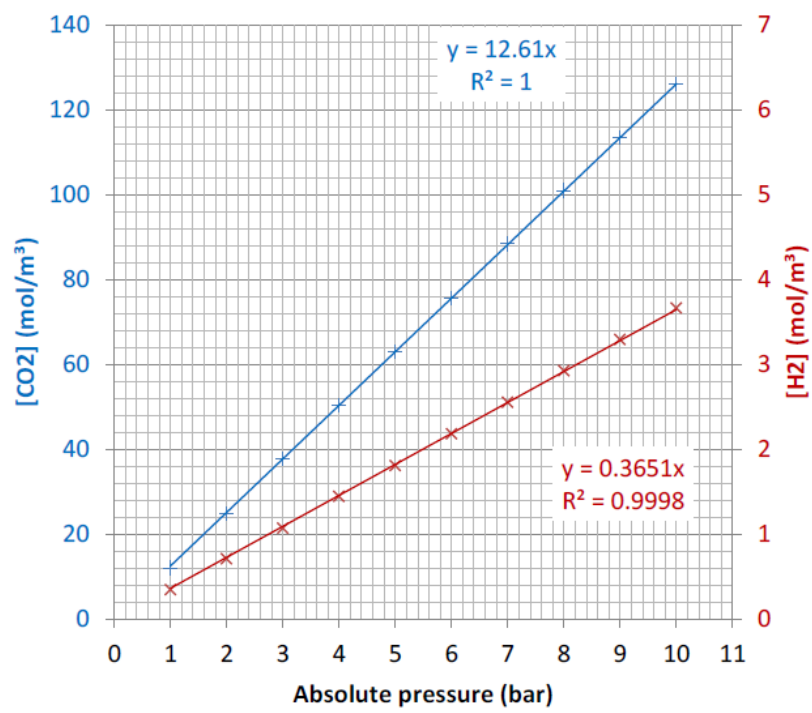

**FIGURE S2**

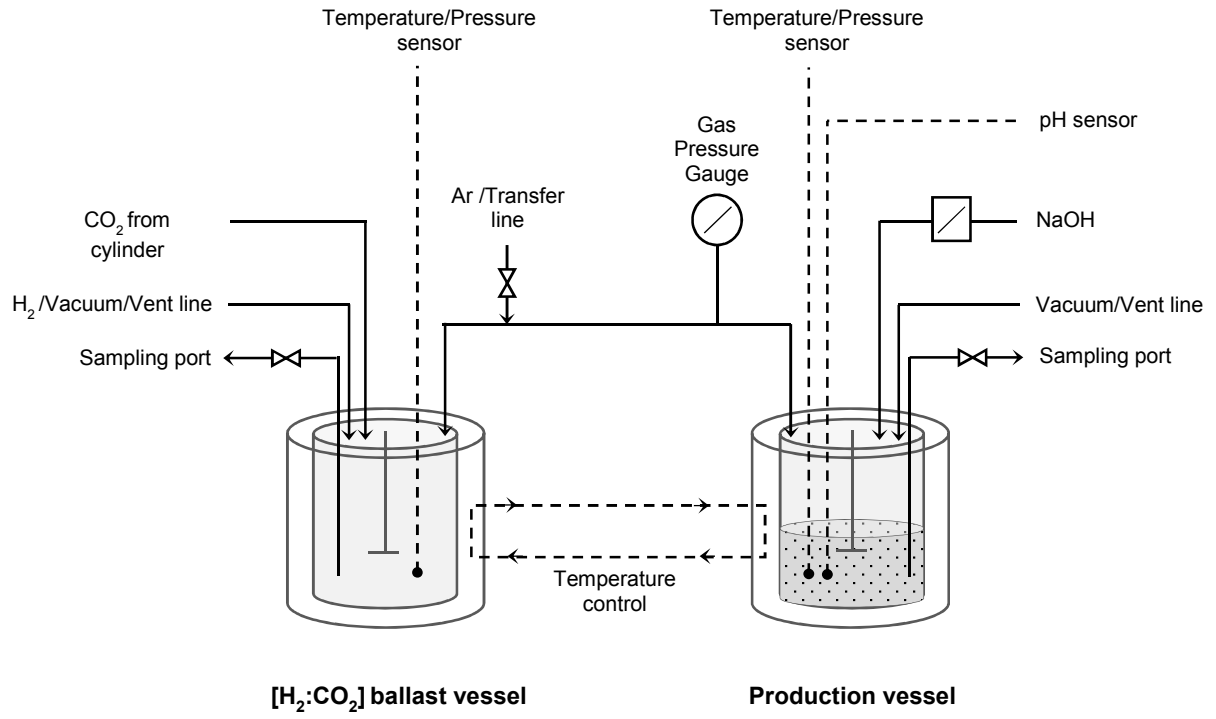

**FIGURE S3**

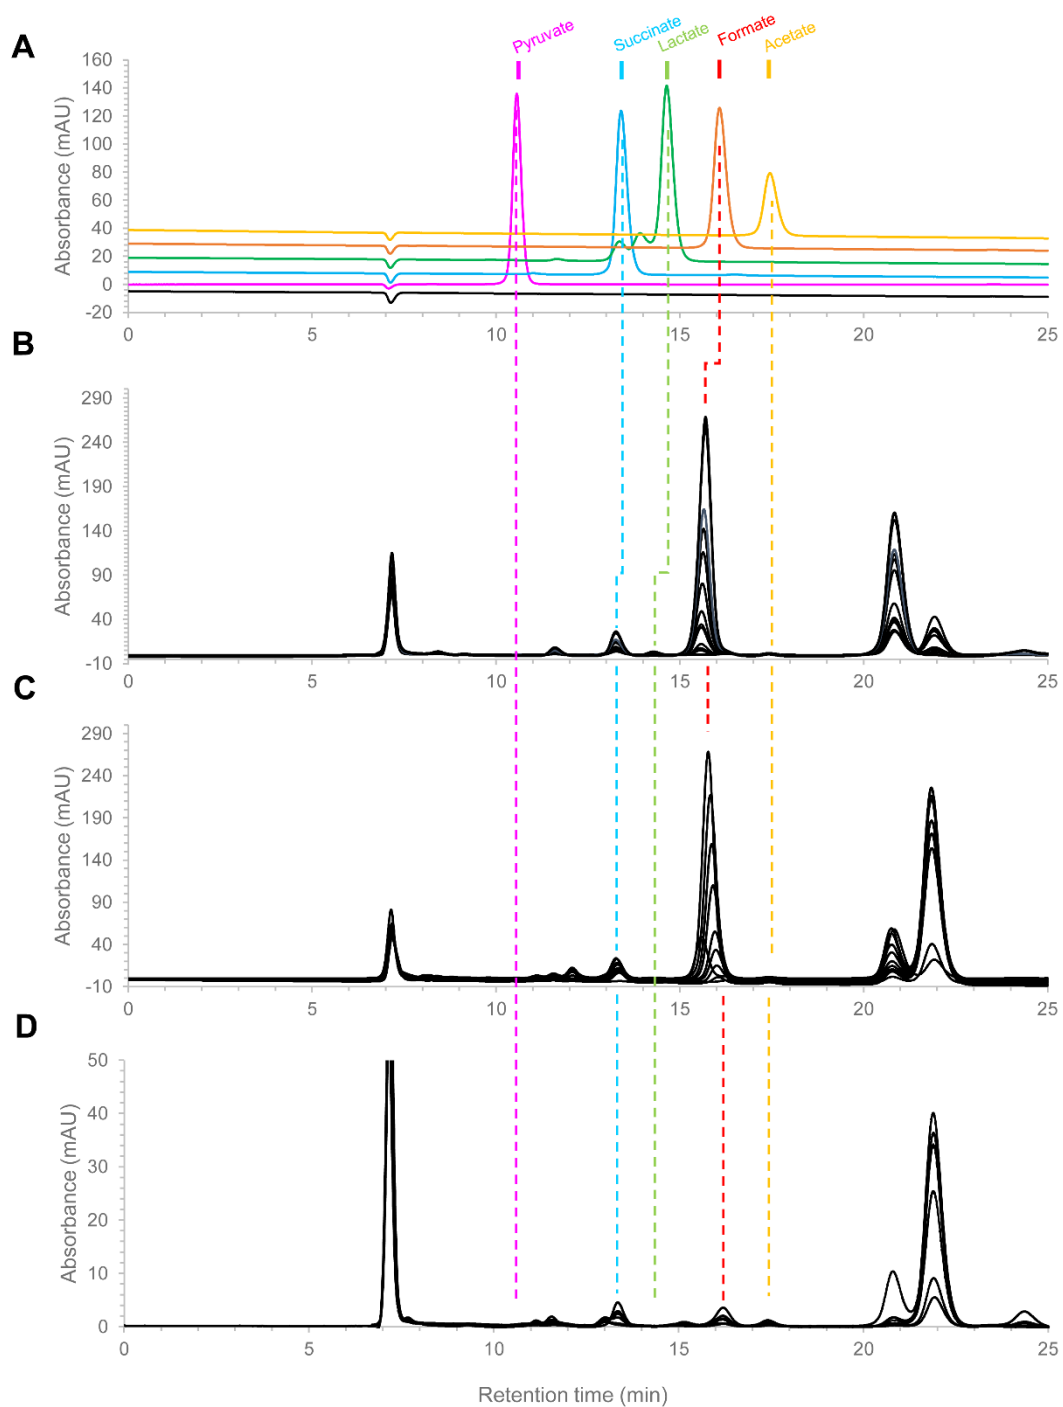

**Figure S1. The relationship between CO<sub>2</sub> and H<sub>2</sub> solubilities in water for a 50:50 mixture at pressures up to 10 bar.**

**Related to Figure 1.**

The non-random two-liquid (NRTL) activity coefficient model with Henry's law for H<sub>2</sub> and CO<sub>2</sub> was derived from published isothermal data sets for H<sub>2</sub> and CO<sub>2</sub> at 35 °C using Aspen Plus. The model assumes a 50:50 mixture of CO<sub>2</sub>:H<sub>2</sub> under the given conditions.

**Figure S2. Experimental setup for the bioconversion of CO<sub>2</sub> and H<sub>2</sub> into formate using high-pressure reactors.**

**Related to Figures 1, 2, and 4.**

The stainless steel ballast vessel is used for pre-pressurisation of gas mixtures (at 40 bar) and a sampling port allows the amount of each gas in the mixture to be accurately recorded. The ballast vessel is connected to a stainless steel production vessel. This contains the cell suspension in buffer that can be placed under constant pressure from the ballast vessel. It is possible to monitor and control pH in the production vessel and sample the aqueous phase.

**Figure S3. Examples of organic acids produced in the cell suspension during H<sub>2</sub>-dependent CO<sub>2</sub> reduction to formate.**

**Related to Figures 1 and 4.**

(A) 10 µL of various organic acids standards, or clarified samples taken from the production vessel containing either (B) *E. coli* FTD89, (C) RT1 or (D) the control FHL-minus strain RT2 at different time points of the reaction were applied to an Aminex HPX 87H column at 50 °C, using sulfuric acid as mobile phase (0.5 mL.min<sup>-1</sup>). Separated compounds were detected at A<sub>210 nm</sub>. Over the different organic acids analysed, only a trace of succinate (13.4 min retention time), as well as traces of formate (16.2 min retention time), can be detected at the beginning of the experiment. Following pressurisation of the production vessel containing FTD89 or RT1 washed whole-cells with a constant ratio of H<sub>2</sub>:CO<sub>2</sub> at 2 bar pressure, the peak representative of the formate increased over the time, while the RT2 strain was unable to generate formate from H<sub>2</sub> and CO<sub>2</sub>. Finally, two peaks can be observed around 21 and 22 min retention time. Both of them have already been observed in a previous study [S1], however attempts to identify these two peaks were unsuccessful and their identities remain unknown. Nevertheless, these two peaks were also observed after incubation of the FHL-minus control strain RT2 (D), demonstrating that these compounds are produced in an FHL-independent manner.

## SUPPLEMENTAL REFERENCE

**S1.** Pinske, C., and Sargent, F. (2016). Exploring the directionality of *Escherichia coli* formate hydrogenlyase: a membrane-bound enzyme capable of fixing carbon dioxide to organic acid. *Microbiology Open* 5, 721-737.
